# Supplementary material
Source: PubMed Central journal article supplement (PMC2925301)
Supplement: NIHMS205013-supplement-supplement_1.pdf [file NIHMS205013-supplement-supplement_1.pdf]

**Supplementary Table 1. The primers used for RT-PCR of nAChR from MSC are shown where “f” refers to the forward and “r” to the reverse primers**

| nAChR subunit | Primer sequence                                                                  | Product size |
|---------------|----------------------------------------------------------------------------------|--------------|
| $\alpha 1$    | f: 5'-C GAC ACT ATC CCA AAT ATC ATG-3'<br>r: 5'-TTG TTA GAC TCC TGG TCT GTC-3'   | 221 bp       |
| $\alpha 2$    | f: 5'-CTA CGC CTG AAG CTC AGC C-3'<br>r: 5'-TCC TTC ACC GAA GAG TCA GC-3'        | 300 bp       |
| $\alpha 3$    | f: 5'-AC GAG GGC AAC GCT CAG AAG-3'<br>r: 5'-CTC TTT GGC TTC ATT TTG TGC -3'     | 305 bp       |
| $\alpha 4$    | f: 5'-ATC GAG TCC ATG CAT AAG ATG-3'<br>r: 5'-ACC GAG AAG TCT GTG TCT TC-3'      | 644 bp       |
| $\alpha 5$    | f: 5'-TT CAC ACG CTT CCC AAA CTG C-3'<br>r: 5'-ATC ATT TTC CTT CAT GAT GTG TG-3' | 169 bp       |
| $\alpha 6$    | f: 5'-TGG CCT CTG GAC AAG ACA AG-3'<br>r: 5'-AGT CAT CTT CTA CCT CCT TGG-3'      | 301 bp       |
| $\alpha 7$    | f: 5'-CG TGG TTC CTG CGA ATG AAG-3'<br>r: 5'-AAG CGG TTG GCA ATG TAG CG-3'       | 322 bp       |
| $\alpha 9$    | f: 5'-CTG AAA TAC ATG TCC AGG GTC-3'<br>r: 5'-GTG GCC TTG TGG TCT TTG AG-3'      | 302 bp       |
| $\alpha 10$   | f: 5'-TG CTG GGA CAC CTG GCA CG-3'<br>r: 5'-TCA TGG CAG CGC TGG GCA G-3'         | 234 bp       |
| $\beta 1$     | f: 5'-A CCC GAG AGA GAC CTG ATG C-3'<br>r: 5'-TTC AGC GCA TCG TGG TCC TC-3'      | 282 bp       |
| $\beta 2$     | f: 5'-AG CAG CCA CGC CAT CAT TGC-3'<br>r: 5'-CTC TGG TCA TCG TCC TCG C -3'       | 292 bp       |
| $\beta 3$     | f: 5'-CTT TGC ATG AAA GAT CAT GTG G-3'<br>r: 5'-TGT TCT TTC TTC ACA TGT CTC G-3' | 197 bp       |
| $\beta 4$     | f: 5'-TC TTC ATG AAG CGC CCT GGC-3'<br>r: 5'-TCT CTG GTC TTC ATC GTC ATT C-3'    | 306 bp       |

**Supplementary Table 2. Summary of nAChR sub-unit expression in comparison with the findings of Hoogduijn et al., 2008**

| nAChR subunit | Schraufstatter et al.<br>RT-PCR | Schraufstatter et al.<br>Western & IH | Hoogduijn et al.<br>RT-PCR | Hoogduijn et al.<br>FACS |
|---------------|---------------------------------|---------------------------------------|----------------------------|--------------------------|
| $\alpha 1$    | +                               |                                       |                            |                          |
| $\alpha 2$    | +                               |                                       |                            |                          |
| $\alpha 3$    | +                               | -                                     | +                          | +                        |
| $\alpha 4$    | +                               | -                                     |                            |                          |
| $\alpha 5$    | +                               |                                       | +                          | +                        |
| $\alpha 6$    | -                               |                                       |                            |                          |
| $\alpha 7$    | +                               | +                                     | +                          | +                        |
| $\alpha 9$    | +                               |                                       | -                          |                          |
| $\alpha 10$   | -                               |                                       | -                          |                          |
| $\beta 1$     | -                               |                                       |                            |                          |
| $\beta 2$     | +                               | +                                     | -                          |                          |
| $\beta 3$     | +                               |                                       |                            |                          |
| $\beta 4$     | +                               | +                                     | -                          |                          |

bungarotoxin suggesting a role for  $\alpha 7$  subunits of nAChR in mediating these effects of nicotine. Unfortunately it was not feasible to block the effects of nicotine on hMSCs migration in vivo due to toxic side effects of  $\alpha$ -bungarotoxin (not shown).

There are contradictory reports regarding the effects of nicotine on cell migration. While some groups reported that nicotine stimulates cell migration (Totti, McCusker et al. 1984; Nowak, Ruta et al. 1990; Li, Zhao et al. 2004; Di Luozzo, Pradhan et al. 2005), others demonstrated that nicotine is an inhibitory factor (Bridges, Kraal et al. 1977; Giannopoulou, Geinoz et al. 1999; Serobyany, Schraufstatter et al. 2005). We and others have previously published that nicotine induces signal transduction in non-neural cells (Kihara, Shimohama et al. 2001; Serobyany, Schraufstatter et al. 2005; Hoogduijn, Cheng et al. 2008), activation of which can be associated with increased cell motility. However, the signaling mechanisms activated might depend on the specific cell types and the diverse experimental conditions that were used in these different studies. For example, we detected Erk1/2 phosphorylation in endothelial cells (Serobyany, Schraufstatter et al. 2005), but not in hMSC (Supplementary Figure 1).

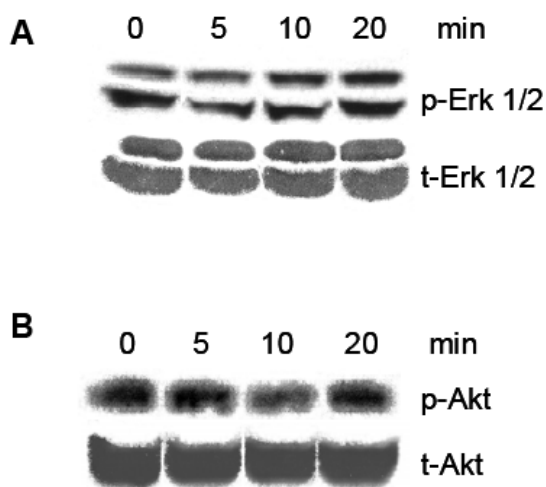

Supplemental Figure 1. The effect of nicotine on signal transduction in hMSCs. Human MSCs were cultured in 6-well plates until 60-70% confluence and treated with 10-7M nicotine for various periods of time as indicated. Phosphorylation of Erk 1/2 (A) and Akt (B) was measured by Western blot. Loading of the samples was controlled by measuring the total amount of Erk 1/2 and Akt.

Furthermore, the effect of nicotine on cells exposed to chemotactic factors might be different from that on serum-starved cells usually used for studying signal transduction. In addition, the effects of nicotine on cell migration may not necessarily be associated with signaling, but could be the result of a detrimental effect of nicotine on the expression of receptors for chemotactic factors, which was previously shown for CXCR4 (Serobyany, Jagannathan et al. 2007). Thus, further studies on the molecular mechanisms that mediate the effect of nicotine on cell migration are needed since nAChRs may represent an attractive therapeutic target for regulating the migration of non-neural cells.

## Acknowledgment

We thank Dr. Marina Skok for providing the nAChR specific antibodies used in this study. We thank Valentina Goncharova for excellent technical support. Human MSCs employed in this work were provided by the Tulane Center for Gene Therapy through a grant from NCCR of the NIH, Grant # P40RR017447. This project was funded by the University of California Tobacco Related Disease Research Program (TRDRP-16RT-0134) and NIH (R21NS062428) to SKK.

## References

- Beckel, J. M., A. Kanai, et al. (2006). "Expression of functional nicotinic acetylcholine receptors in rat urinary bladder epithelial cells." *Am. J. Physiol. Renal. Physiol.* 290(1): F103-10.
- Berridge, M. J., M. D. Bootman, et al. (1998). "Calcium--a life and death signal." *Nature* 395(6703): 645-8.
- Bridges, R. B., J. H. Kraal, et al. (1977). "Effects of cigarette smoke components on in vitro chemotaxis of human polymorphonuclear leukocytes." *Infect Immun.* 16(1): 240-8.
- Carty, C. S., P. D. Soloway, et al. (1996). "Nicotine and cotinine stimulate secretion of basic fibroblast growth factor and affect expression of matrix metalloproteinases in cultured human smooth muscle cells." *J. Vasc. Surg.* 24(6): 927-34; discussion 934-5.
- Chamberlain, G., J. Fox, et al. (2007). "Concise review: mesenchymal stem cells: their phenotype, differentiation capacity, immunological features, and potential for homing." *Stem Cells* 25(11): 2739-49.
